# Supplementary material
Source: Springer Nature journal article supplement (https://www.springermedizin.de/resource/supplementary/12889_2012_4698_MOESM2_ESM.pdf/9493754)

number of respondents/10,000 total population

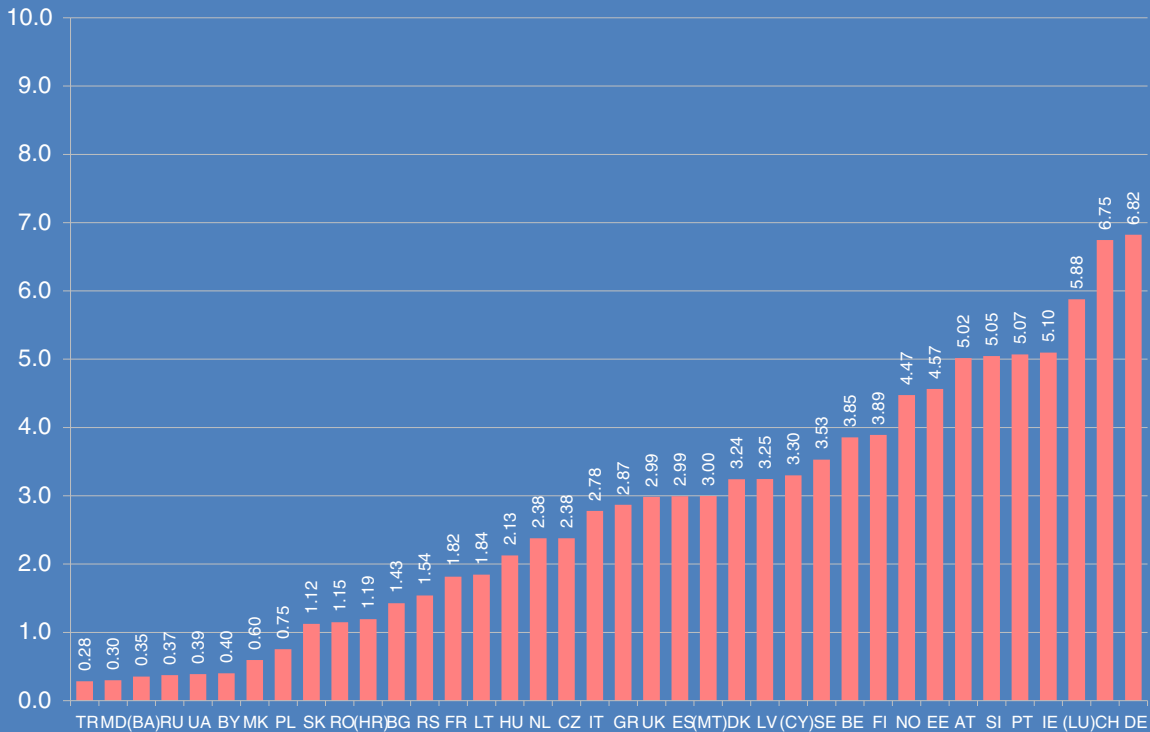

Supplement: MOESM2 [file 9493754]
